# Supplementary material for: Reconstitution and mechanistic dissection of the human microtubule branching machinery
Source: PubMed Central journal article supplement — J Cell Biol. 2022 May 23;221(7):e202109053. doi: 10.1083/jcb.202109053 (PMC9129923; doi:10.1083/jcb.202109053), 2022-05-23

# Figure 5

## Fig. 5A

Bait: Bio-NEDD1 Prey:  $\gamma$ -TuRC<sup>NEDD1</sup>

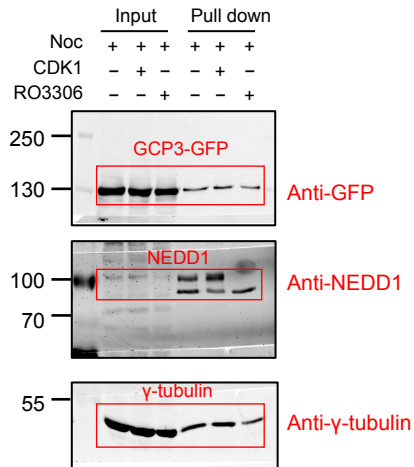

## Fig. 5B

Bait: Bio-NEDD1 Prey:  $\gamma$ -TuRC<sup>NEDD1</sup>

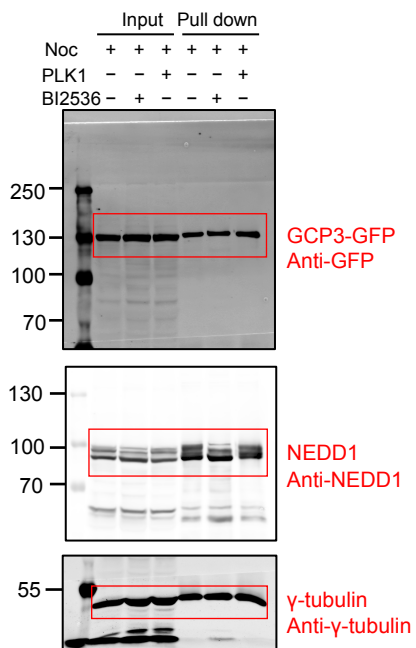

## Fig. 5C

Bait: GCPs-GFP-Bio Prey: HA-NEDD1

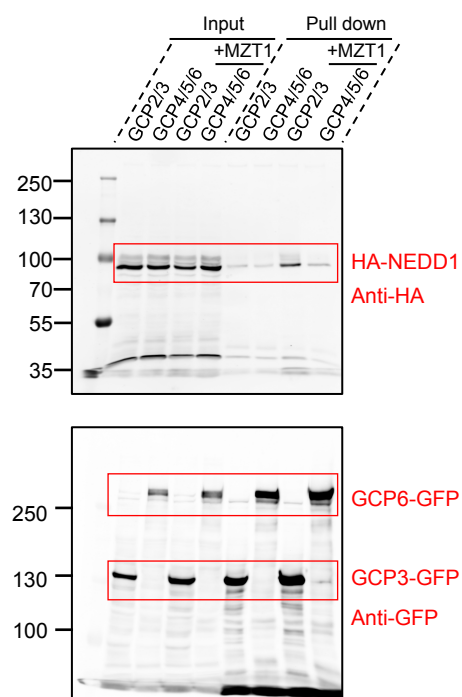

# Figure 5

## Fig. 5D

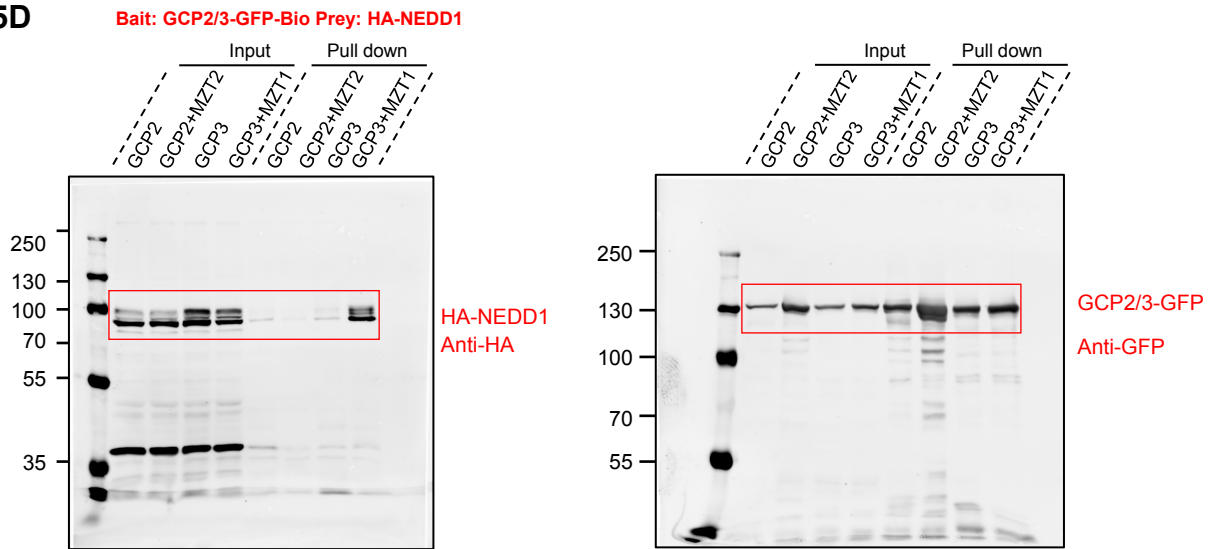

## Fig. 5F

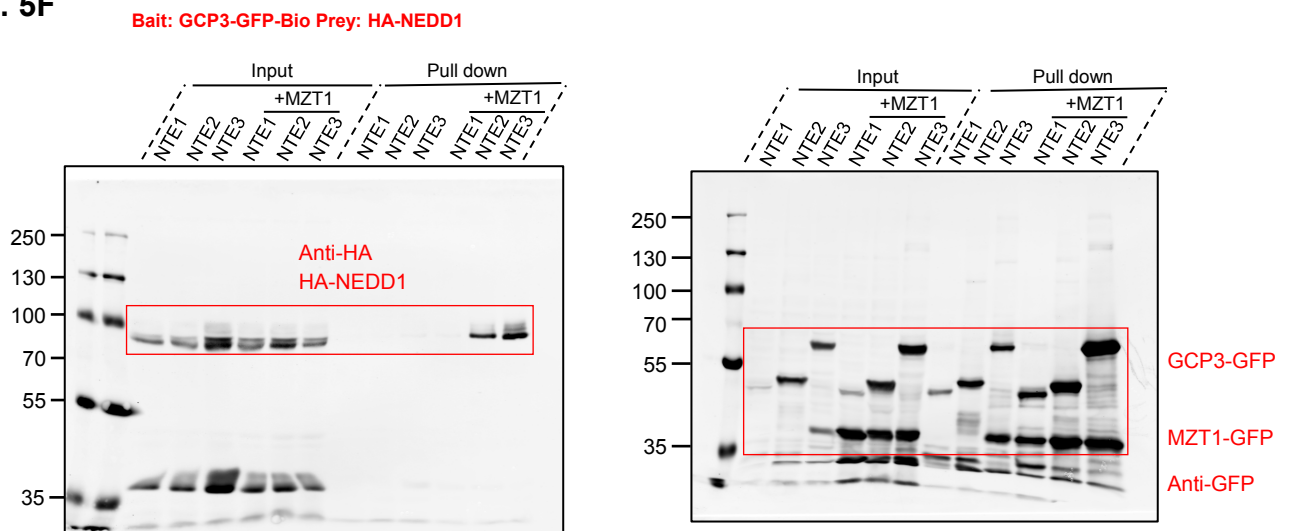

## Fig. 5H

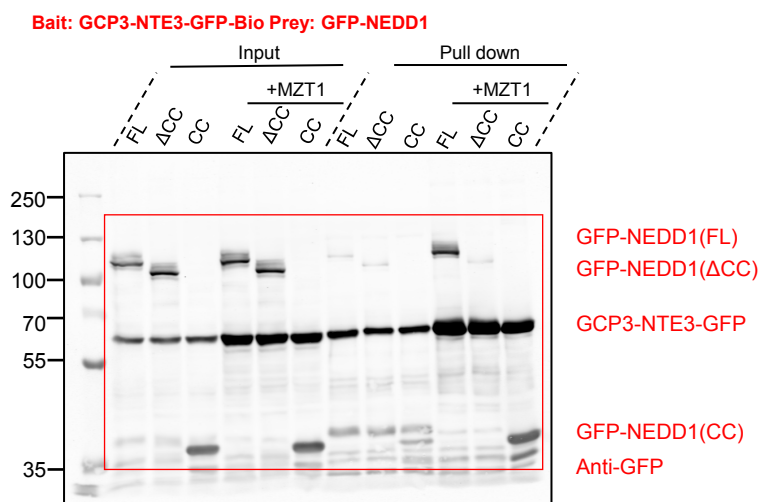

Supplement: JCB_202109053_SourceDataF5.pdf [file JCB_202109053_SourceDataF5.pdf]
