# Supplementary figures and images for: Reconstitution and mechanistic dissection of the human microtubule branching machinery
Source: PubMed Central journal article supplement — J Cell Biol. 2022 May 23;221(7):e202109053. doi: 10.1083/jcb.202109053 (PMC9129923; doi:10.1083/jcb.202109053), 2022-05-23

Figure 1

Fig.1A

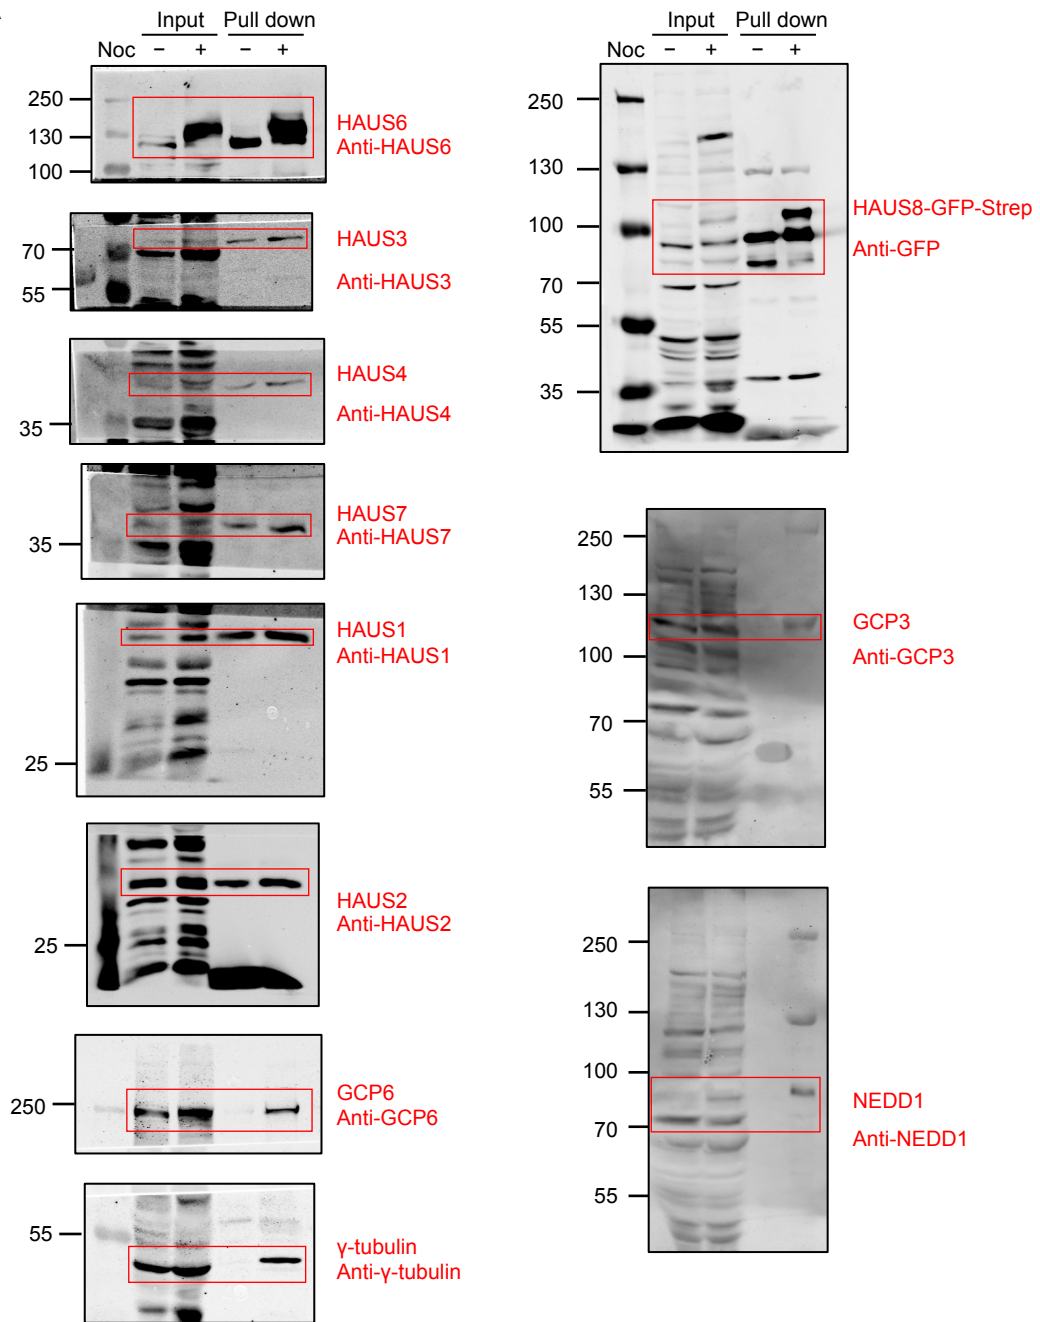

Supplement: JCB_202109053_SourceDataF1.pdf [file JCB_202109053_SourceDataF1.pdf]

# Figure 3

Fig. 3I

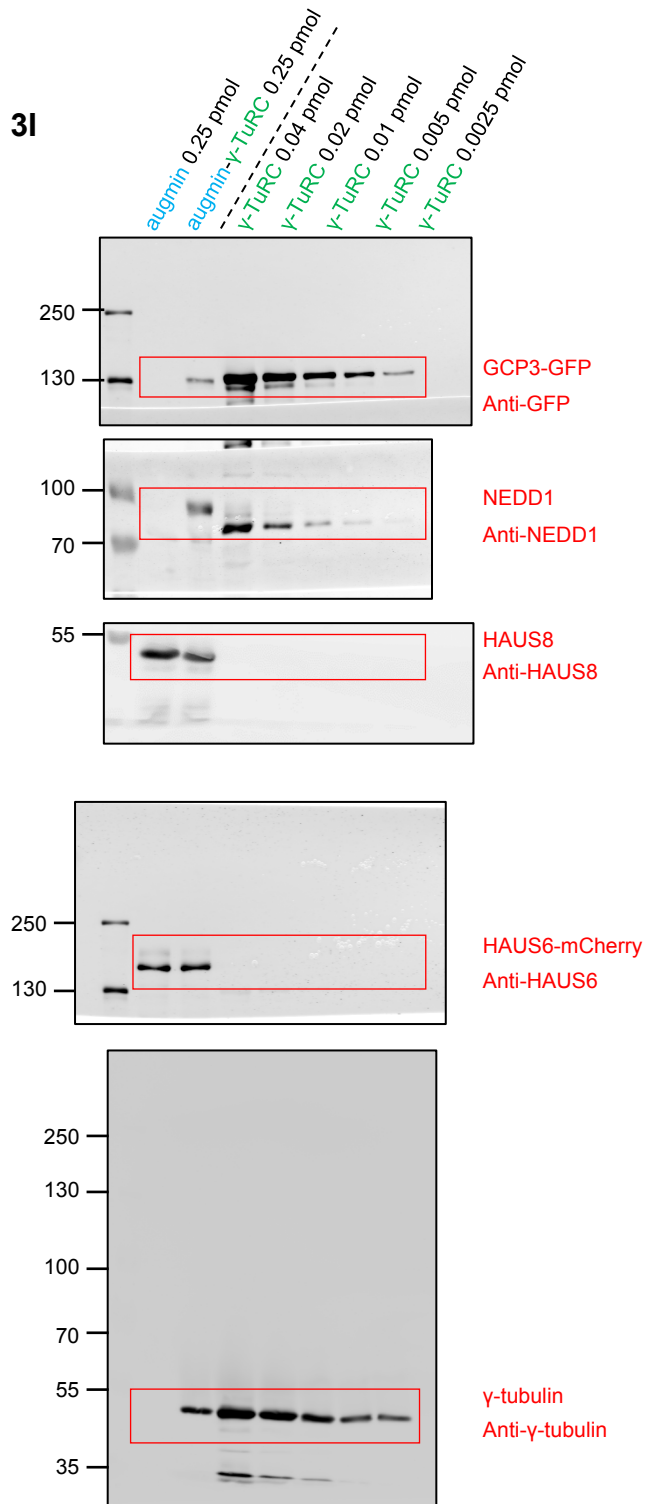

Supplement: JCB_202109053_SourceDataF3.pdf [file JCB_202109053_SourceDataF3.pdf]

# Figure 4

## Fig. 4A

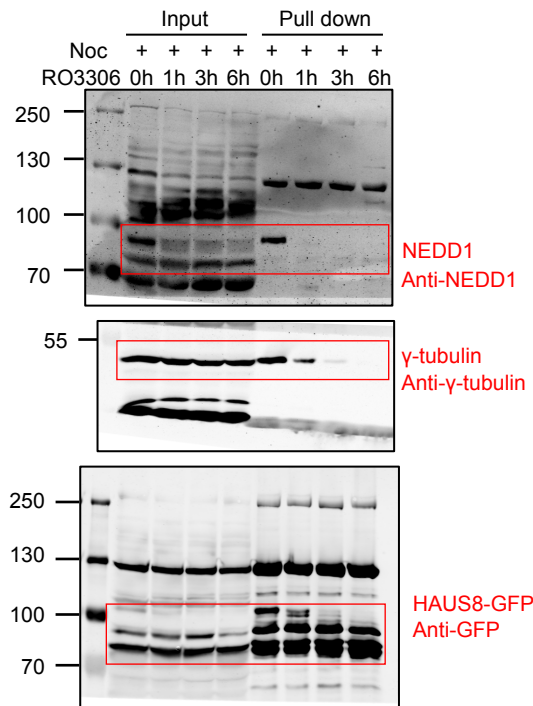

## Fig. 4B

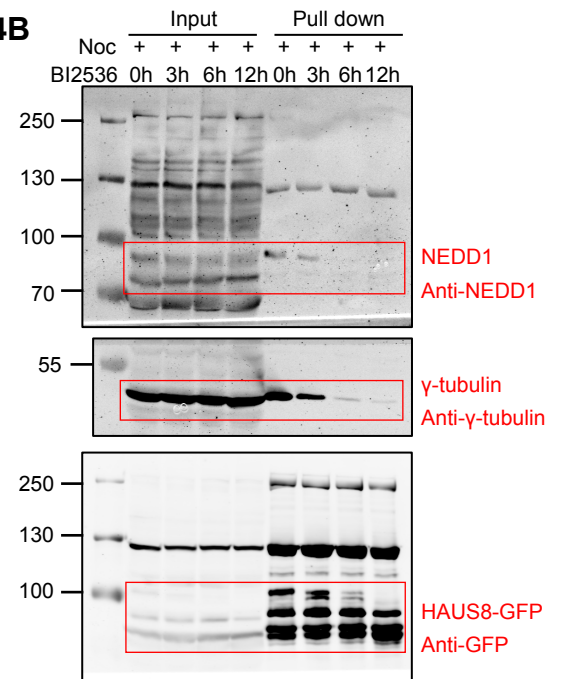

## Fig. 4C

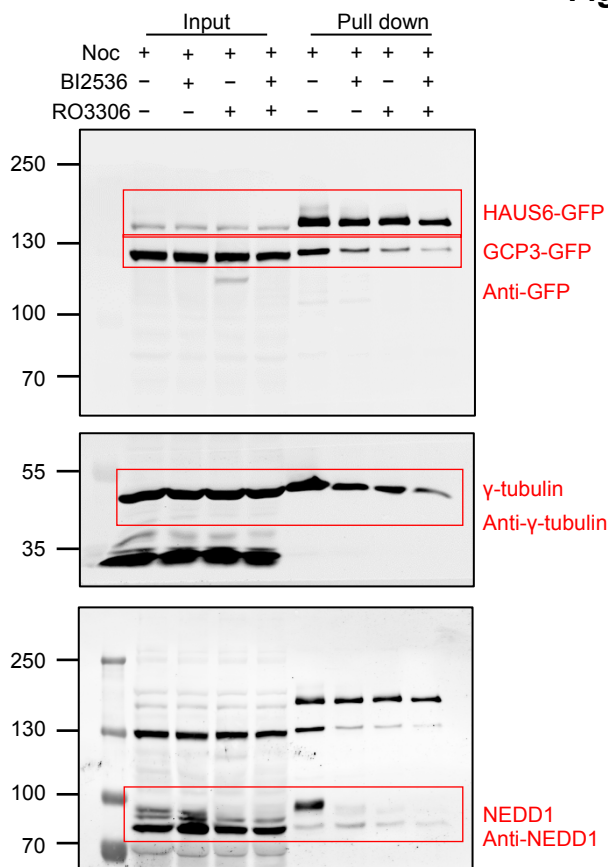

## Fig. 4D

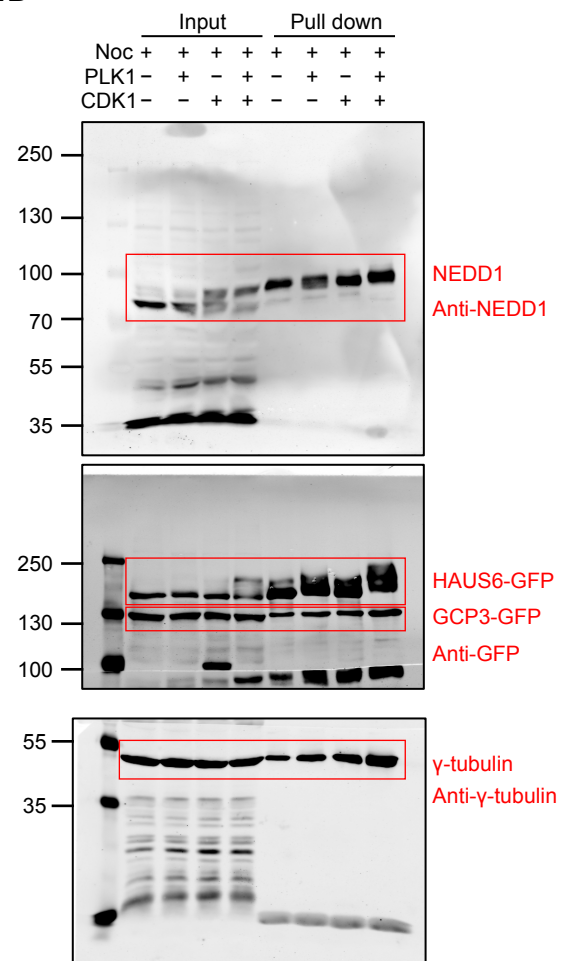

Supplement: JCB_202109053_SourceDataF4.pdf [file JCB_202109053_SourceDataF4.pdf]

# Figure 6

## Fig. 6A

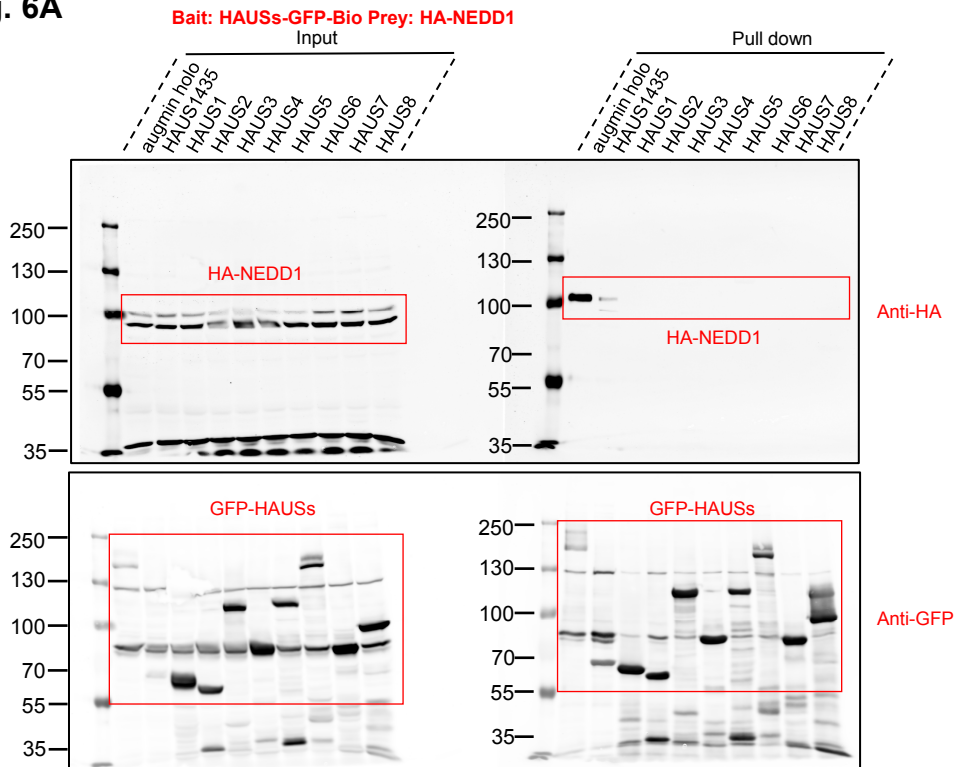

## Fig. 6C

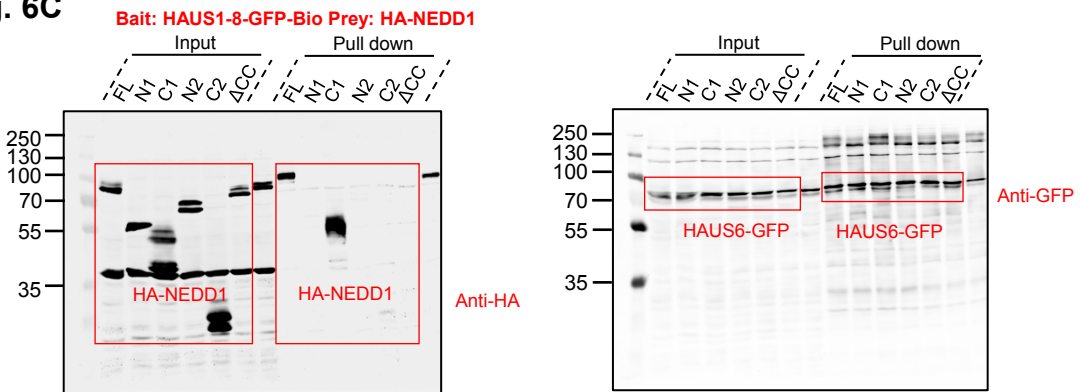

## Fig 6D

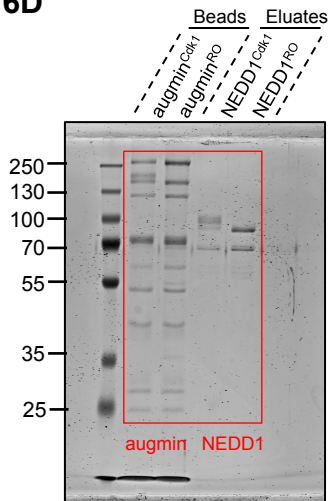

## Fig. 6E

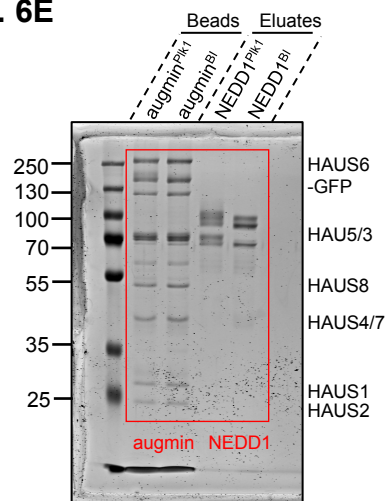

# Figure 6

## Fig. 6F

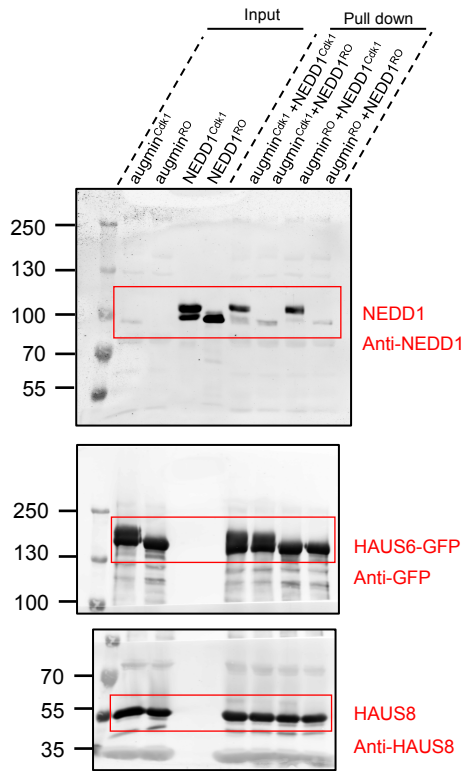

## Fig. 6G

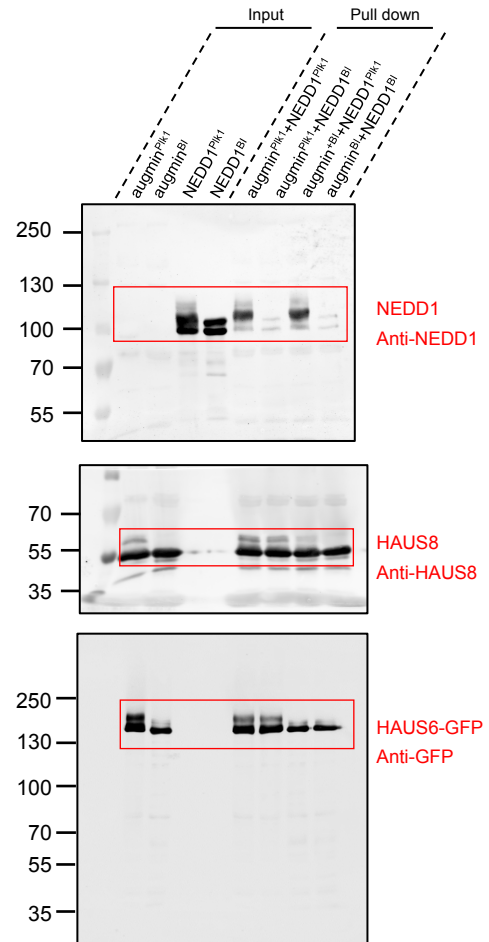

Supplement: JCB_202109053_SourceDataF6.pdf [file JCB_202109053_SourceDataF6.pdf]

# Figure 7

## Fig. 7E

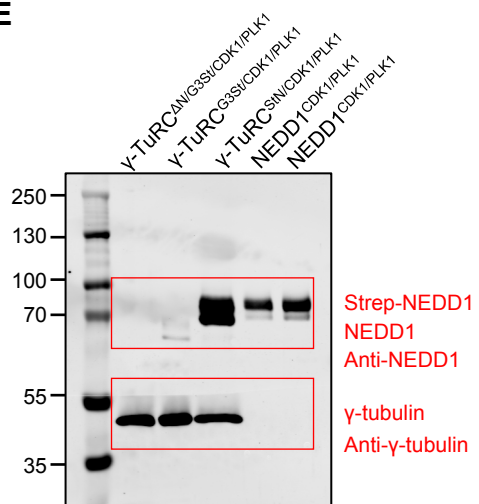

Supplement: JCB_202109053_SourceDataF7.pdf [file JCB_202109053_SourceDataF7.pdf]

# Figure S1

## Fig. S1C

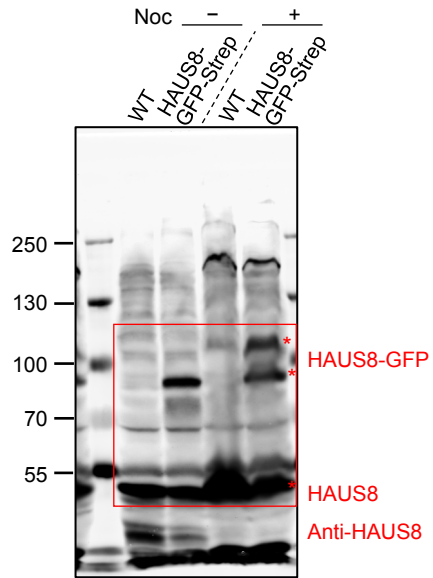

## Fig. S1D

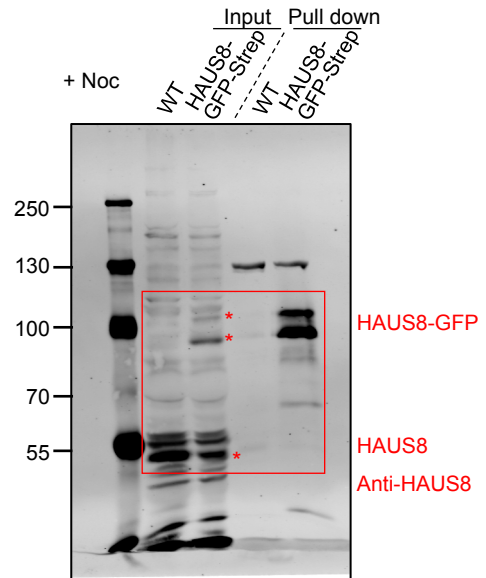

## Fig. S1F

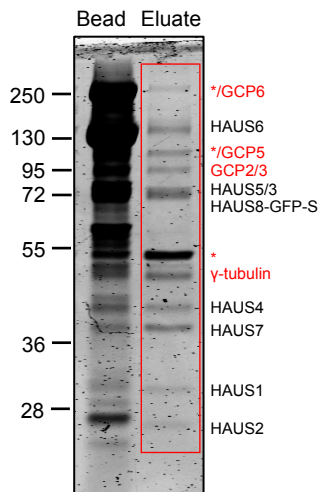

Supplement: JCB_202109053_SourceDataFS1.pdf [file JCB_202109053_SourceDataFS1.pdf]

# Figure S2

## Fig. S2B

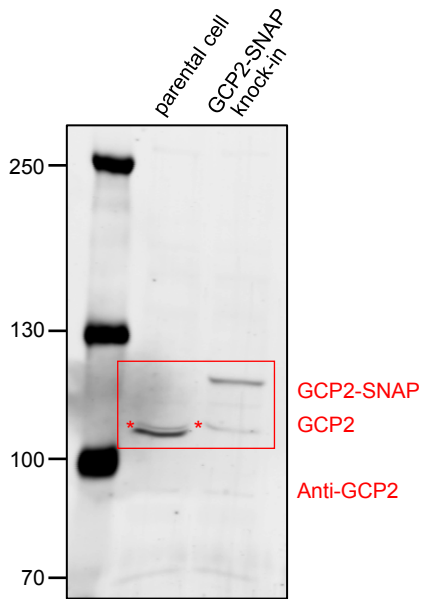

## Fig. S2E

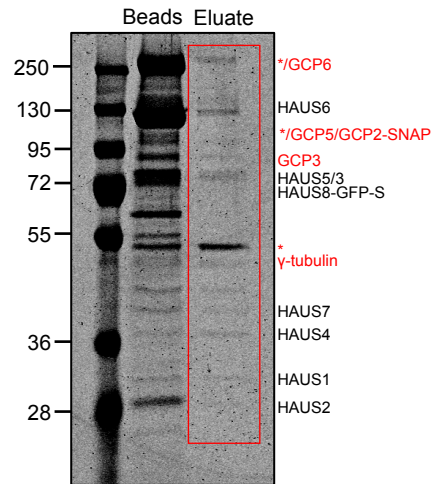

Supplement: JCB_202109053_SourceDataFS2.pdf [file JCB_202109053_SourceDataFS2.pdf]

# Figure S3

**Fig. S3D**

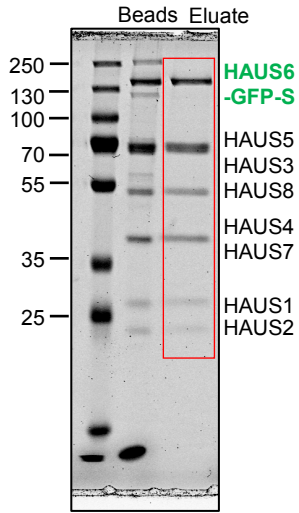

**Fig. S3E**

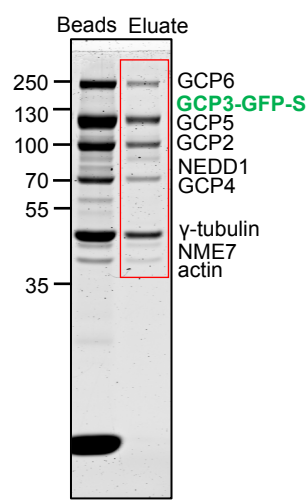

**Fig. S3K**

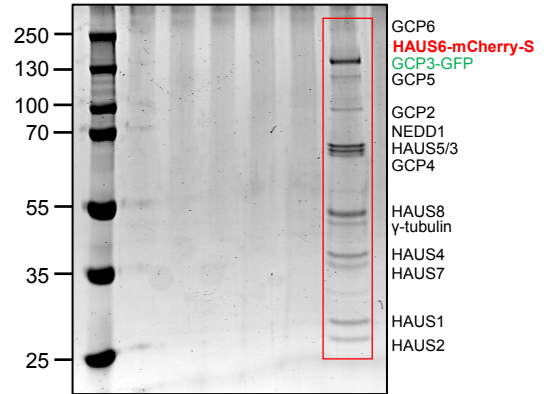

**Fig. S3O**

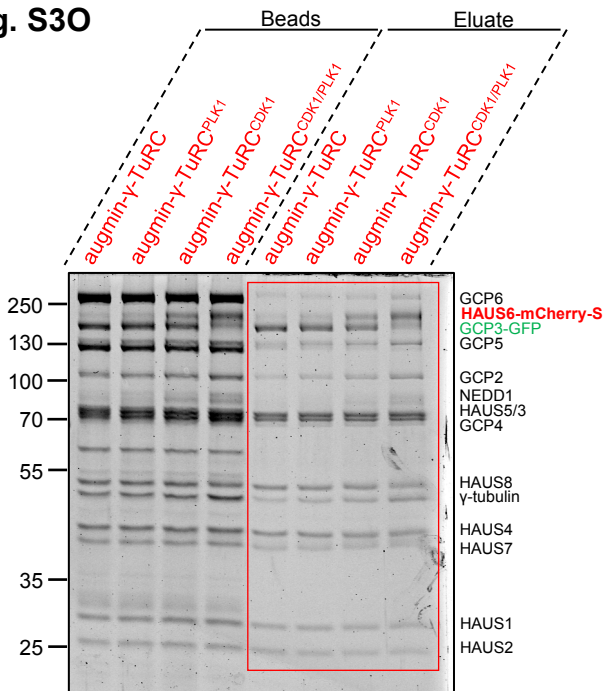

Supplement: JCB_202109053_SourceDataFS3.pdf [file JCB_202109053_SourceDataFS3.pdf]

# Figure S4

## Fig. S4A

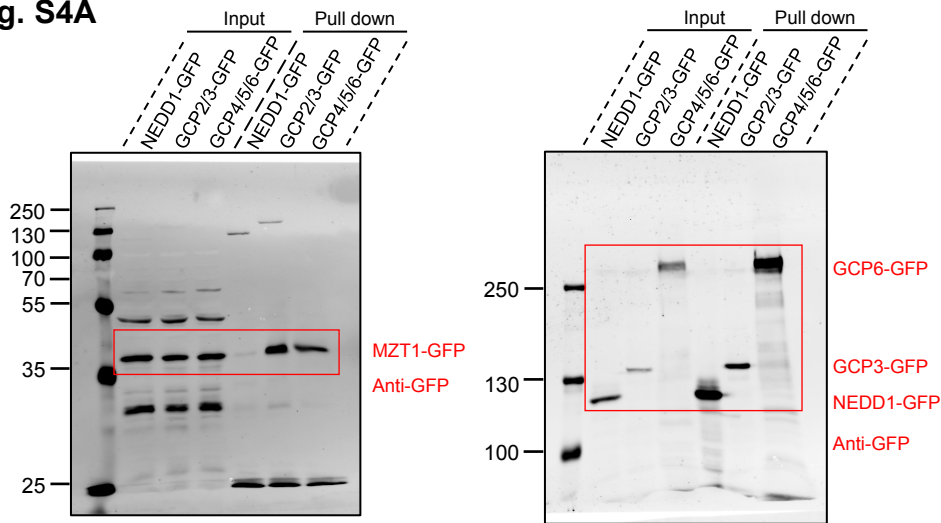

## Fig. S4B

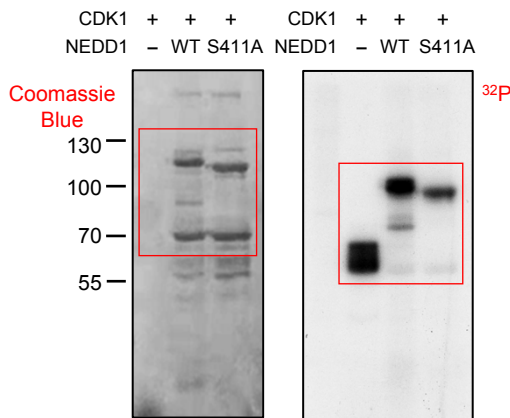

## Fig S4C

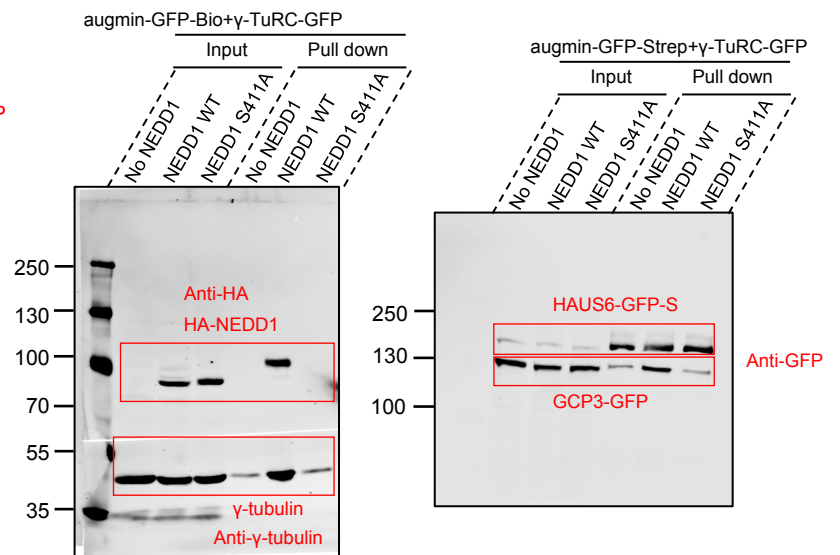

## Fig. S4D

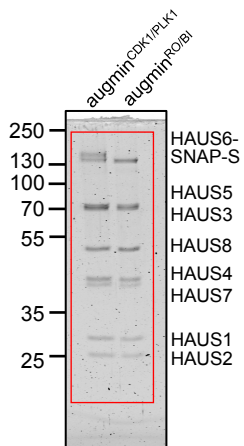

## Fig. S4E

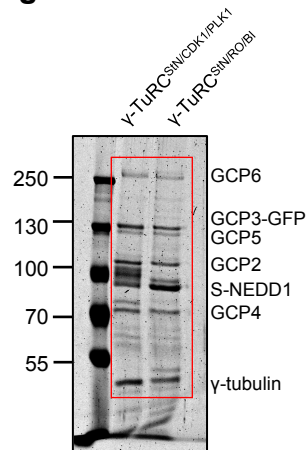

Supplement: JCB_202109053_SourceDataFS4.pdf [file JCB_202109053_SourceDataFS4.pdf]
